# Supplementary material for: Tumor-targeted interleukin-12 synergizes with entinostat to overcome PD-1/PD-L1 blockade-resistant tumors harboring MHC-I and APM deficiencies
Source: PubMed Central journal article supplement — J Immunother Cancer. 2022 Jun 28;10(6):e004561. doi: 10.1136/jitc-2022-004561 (PMC9240938; doi:10.1136/jitc-2022-004561), 2022-06-28
Supplement: jitc-2022-004561supp002.pdf [file jitc-2022-004561supp002.pdf]

## Tumor-targeted interleukin-12 synergizes with entinostat to overcome PD-1/PD-L1 blockade-resistant tumors harboring MHC-I and APM deficiencies

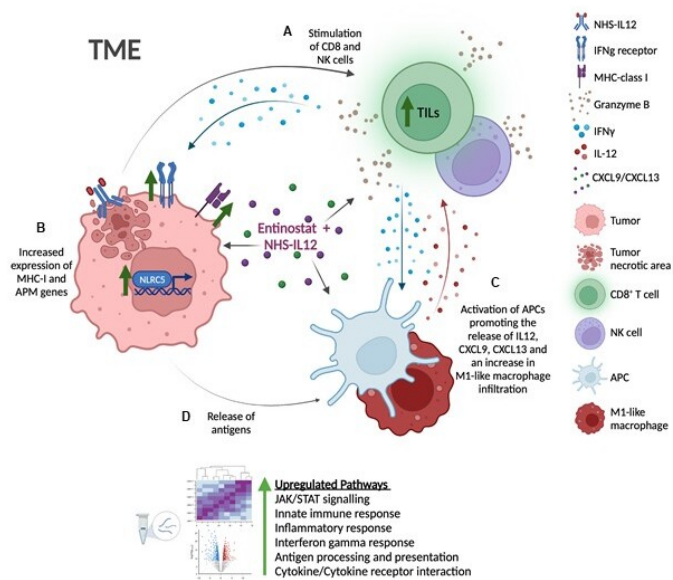

### Authors

Christine M. Minnar, Paul L. Chariou, Lucas A. Horn, Kristin C. Hicks, Claudia Palena, Jeffrey Schlom, and Sofia R. Gameiro

### Correspondence

[schlomj@mail.nih.gov](mailto:schlomj@mail.nih.gov)

### In Brief

Entinostat and NHS-IL12 combination elicits potent anti-tumor activity against tumors with MHC-I, antigen processing machinery (APM), and IFN $\gamma$  response deficiencies, and differing tumor mutational burden by activating an IFN $\gamma$  and IL-12 feedback loop thereby increasing cytotoxic CD8<sup>+</sup> T cell, M1 macrophage and antigen presenting cell (APC) infiltration into the tumor microenvironment (TME).
